# Supplementary material for: A fast and stable algorithm for calculating the non-parametric maximum likelihood estimate of left-truncated and interval-censored data
Source: Research Square preprint supplement (doi:10.21203/rs.3.rs-5684468/v1), 2025-03-25
Supplement: Supplementary file 1 [file ce71f308ae8666f0f27af083.pdf]

# Supplementary Material: A fast and stable algorithm for calculating the non-parametric maximum likelihood estimate of left-truncated and interval-censored data

Zachary Waller, Adele H. Marshall, Frank Kee, Felicity Lamrock

## 1 Other NPMLE algorithms

Here are the forms of the NPMLE algorithms used for comparison in the simulations in Section 5. Each requires the inner-intervals calculated as in Section 2. The EM algorithms are all parameterized to allow for  $O(n)$  implementation (or  $O(n_1)$  in the Breslow method case).

### 1.1 Turnbull's Algorithm

From [Turnbull \(1976\)](#).

Step 1. For  $j = 1, \dots, m$ , let  $s_j^{(0)} = 1/m$ .

Step  $g + 1$  ( $g \geq 1$ ). For  $1 \leq j \leq m$ , update  $s_j$  by

$$s_j^{(g+1)} = s_j^{(g)} \frac{M_j^{(g)}}{\sum_{k=1}^m M_k^{(g)}}$$

where

$$M_j^{(g)} = \sum_{i=1}^n \left[ \frac{\alpha_{ij}}{S_{L_i^*}^{(g)} - S_{R_i^*}^{(g)}} + \frac{(1 - \beta_{ij})}{S_{T_i^*}^{(g)}} \right] \quad (1)$$

and

$$S_k^{(g)} = 1 - \sum_{l=1}^k s_l^{(g)}$$

with  $S_0^{(g)} = 1$ .

Stop when  $|\log \mathcal{L}^{(g+1)} - \log \mathcal{L}^{(g)}| < \epsilon$  where  $\epsilon$  is some small positive number.

## 1.2 Yu's Algorithm

From [Yu \(2023\)](#).

Step 1. For  $j = 1, \dots, m$ , let  $s_j^{(0)} = 1/m$ .

Step  $g + 1$  ( $g \geq 1$ ). For  $1 \leq j \leq m$ , update  $s_j$  by

$$s_j^{(g+1)} = s_j^{(g)} \frac{1}{n} \sum_{i=1}^n \left[ \frac{\alpha_{ij}}{S_{L_i^*}^{(g)} - S_{R_i^*}^{(g)}} + \delta_i \left( 1 - \frac{\beta_{ij}}{S_{T_i^*}^{(g)}} \right) \right]$$

where

$$\delta_i = I(S_{T_i^*}^{(g)} < 1)$$

and

$$S_k^{(g)} = 1 - \sum_{l=1}^k s_l^{(g)}$$

with  $S_0^{(g)} = 1$ .

Stop when  $|\log \mathcal{L}^{(g+1)} - \log \mathcal{L}^{(g)}| < \epsilon$  where  $\epsilon$  is some small positive number.

## 1.3 Shen's Algorithm

From [Shen \(2020\)](#).

Step 1. For  $j = 1, \dots, m$ , let  $s_j^{(0)} = 1/m$ .

Step  $g + 1$  ( $g \geq 1$ ). For  $1 \leq j \leq m$ , update  $s_j$  by

$$s_j^{(g+1)} = s_j^{(g)} \left\{ 1 + \frac{\sum_{i=1}^n \left[ \frac{\alpha_{ij}}{S_{L_i^*}^{(g)} - S_{R_i^*}^{(g)}} - \frac{\beta_{ij}}{S_{T_i^*}^{(g)}} \right]}{\sum_{i=1}^n 1/S_{T_i^*}^{(g)}} \right\}$$

where

$$S_k^{(g)} = 1 - \sum_{l=1}^k s_l^{(g)}$$

with  $S_0^{(g)} = 1$ .

Stop when  $|\log \mathcal{L}^{(g+1)} - \log \mathcal{L}^{(g)}| < \epsilon$  where  $\epsilon$  is some small positive number.

## 1.4 Breslow method

Adapted from [Li et al. \(2020\)](#) and Appendix A of Gao and Chan [Gao and Chan \(2018\)](#). This parameterizes the likelihood using the cumulative hazard  $\Lambda(t)$  where  $S(t) = e^{-\Lambda(t)}$  with  $\lambda_j = \Lambda(r_j) - \Lambda(l_j)$ .

Step 1. For  $j = 1, \dots, m$ , let  $\lambda_j^{(0)} = 1/m$ .

Step  $g + 1$  ( $g \geq 1$ ). For  $1 \leq j \leq m$ , update  $\lambda_j$  by

$$\lambda_j^{(g+1)} = \frac{\sum_{i=n_0+1}^n w_{ij}^{(g)}}{\sum_{i=n_0+1}^n I(Q_j \subseteq [T_i, \tilde{R}_i])}$$

where

$$\tilde{R}_i = I(R_i < \infty)R_i + I(R_i = \infty)L_i,$$

$$w_{ij}^{(g)} = I(Q_j \subseteq (L_i, R_i], R_i < \infty) \frac{\lambda_j^{(g)}}{1 - \exp\left(-\Lambda_{R_i^*}^{(g)} + \Lambda_{L_i^*}^{(g)}\right)}$$

and

$$\Lambda_k^{(g)} = \sum_{l=1}^k \lambda_l^{(g)}$$

with  $\Lambda_0 = 0$ .

Stop when  $|\log \mathcal{L}^{(g+1)} - \log \mathcal{L}^{(g)}| < \epsilon$  where  $\epsilon$  is some small positive number.

## 1.5 Quasi-Newton method

Adapted from a description of a process recommended by [Hudgens \(2005\)](#). The exact details are not given there, but this method should be similar.

This method requires the R function `optim` - a generic optimization function and requires the likelihood from Equation 1 and the gradient of the likelihood from

$$\frac{\partial \log \mathcal{L}}{\partial s_j} = \sum_{i=1}^n \left[ \frac{\alpha_{ij}}{\sum_{k=1}^m \alpha_{ik} s_k} - \frac{\beta_{ij}}{\sum_{k=1}^m \beta_{ik} s_k} \right]. \quad (2)$$

Because `optim` minimizes objective functions by default, we supply it with the negative likelihood and gradient. We set the `optim` function to call the L-BFGS-B algorithm ([Byrd et al., 1995](#)), a memory limited version of the Broyden-Fletcher-Goldfarb-Shanno algorithm that allows box constraints for each parameter. To improve stability, we found it necessary to limit each parameter to  $0 + tol \leq s_j \leq 1 - tol$  for  $1 \leq j \leq m$  where  $tol$  is some small tolerance value. For the simulations we chose  $tol = 10^{-10}$ , and found that smaller values did little to increase accuracy.

The values  $\tilde{s}_j$  given as output by `optim` are normalized to equal one  $\hat{s}_j = \tilde{s}_j / \sum_{k=1}^m \tilde{s}_k$ .

## 2 Karush-Kuhn-Tucker Conditions

From the Lagrangian in Equation 6, and the conditions for all values of  $h_j$ , some conditions for convergence of the algorithm can be formulated. This follows closely the approach of [Gentleman and Geyer \(1994\)](#).

Let  $D_j = \frac{\partial \log \mathcal{L}}{\partial h_j}$ . From Equation 6, it is clear that, at the maximum likelihood

$$D_j + a_j - b_j = 0$$

where  $a_j, b_j \geq 0$ ,  $a_j h_j = 0$  and  $b_j(1 - h_j) = 0$ . These conditions must all be met at for a candidate solution to be the maximum likelihood. This implies that when  $0 < h_j < 1$ ,  $a_j = b_j = 0$  and  $D_j = 0$ .

If  $h_j = 0$ ,  $b_j = 0$  and therefore  $a_j = -D_j$ . Given,  $a_j \geq 0$  this implies that  $D_j \leq 0$ .

Conversely, if  $h_j = 1$ ,  $a_j = 0$  and therefore  $b_j = D_j$  and  $D_j \geq 0$ .

Therefore, at the maximum likelihood, the following checks ensure a maximum likelihood estimate

$$D_j \begin{cases} \leq 0 \text{ if } h_j = 0 \\ = 0 \text{ if } 0 < h_j < 1 \\ \geq 0 \text{ if } h_j = 1. \end{cases}$$

For LTIC data, the Hessian of the likelihood need not be negative-definite and so the Karush-Kuhn-Tucker conditions only guarantee a local (potentially non-unique) maximum.

## References

- Byrd, R.H., Lu, P., Nocedal, J., Zhu, C.: A limited memory algorithm for bound constrained optimization. *SIAM Journal on scientific computing* **16**(5), 1190–1208 (1995). Publisher: SIAM
- Gao, F., Chan, K.C.G.: Semiparametric Regression Analysis of Length-Biased Interval-Censored Data. *Biometrics* **75**(1), 121–132 (2018) <https://doi.org/10.1111/biom.12970>
- Gentleman, R., Geyer, C.J.: Maximum likelihood for interval censored data: Consistency and computation. *Biometrika* **81**(3), 618–623 (1994). Publisher: Oxford

University Press

- Hudgens, M.G.: On Nonparametric Maximum Likelihood Estimation with Interval Censoring and Left Truncation. *Journal of the Royal Statistical Society Series B: Statistical Methodology* **67**(4), 573–587 (2005) <https://doi.org/10.1111/j.1467-9868.2005.00516.x>
- Li, C., Pak, D., Todem, D.: Adaptive lasso for the Cox regression with interval censored and possibly left truncated data. *Statistical Methods in Medical Research* **29**(4), 1243–1255 (2020) <https://doi.org/10.1177/0962280219856238>
- Shen, P.-S.: Nonparametric estimators of survival function under the mixed case interval-censored model with left truncation. *Lifetime Data Analysis* **26**(3), 624–637 (2020) <https://doi.org/10.1007/s10985-020-09493-2>
- Turnbull, B.W.: The Empirical Distribution Function with Arbitrarily Grouped, Censored and Truncated Data. *Journal of the Royal Statistical Society: Series B (Methodological)* **38**(3), 290–295 (1976) <https://doi.org/10.1111/j.2517-6161.1976.tb01597.x>
- Yu, Q.: The generalised MLE with truncated interval-censored data. *Journal of Nonparametric Statistics* **35**(2), 266–282 (2023) <https://doi.org/10.1080/10485252.2022.2147173>
